# Supplementary material for: Structural evolution and dielectric properties of biaxially oriented polyethylene/multiwalled carbon nanotube composite films
Source: Royal Society of Chemistry journal article supplement (doi:10.1039/d1ra08031h), 2021-01-01
Supplement: d1ra08031h1.pdf [file d1ra08031h1.pdf]

Supplementary Material for

**Structural evolution and dielectric properties of biaxially oriented polyethylene /  
multiwalled carbon nanotube composite films**

Meihan Li, Guangsheng Shi, Qiang Feng, Jiang Li,\* Jie Zhang,\* Shaoyun Guo

State Key Laboratory of Polymer Materials Engineering, Polymer Research Institute  
of Sichuan University, Chengdu 610065, China

\*Correspondence to: J. Li (E-mail: [li\\_jiang@scu.edu.cn](mailto:li_jiang@scu.edu.cn)) and J. Zhang  
([zh.receive@gmail.com](mailto:zh.receive@gmail.com))

### **Cross-section SEM of the BOPE/MWCNT composite films**

By observing the composite films cross-section through SEM (Fig. S1), not only the aggregated cluster ends of MWCNTs but also the lateral morphology of MWCNTs could be observed, indicating that the MWCNTs were randomly oriented in the BOPE matrix after simultaneous biaxial stretching.

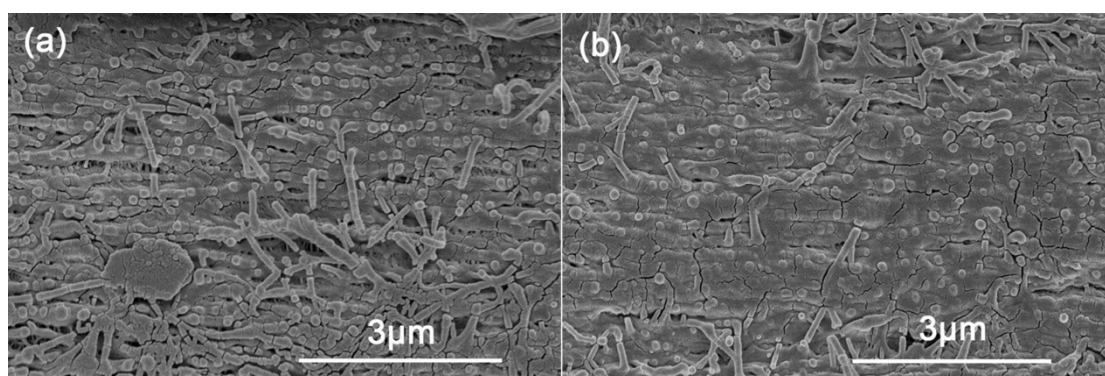

Fig. S1. Cross-section SEM images for BOPE/MWCNT composite films with different MWCNTs content at drawing ratio was 5×5: (a) S-0.6-5; (b) S-0.4-5.
